# Supplementary material
Source: publisher figshare collection journal article supplement (https://acs.figshare.com/ndownloader/files/24960124)
Supplement: Supplementary file 1 [file 24960124]

# Supporting Information: Electrochemical N<sub>2</sub> Reduction to Ammonia using Single Au/Fe Atoms Supported on Nitrogen Doped Porous Carbon

Sudhir K. Sahoo,<sup>†</sup> Julian Heske,<sup>†,‡</sup> Markus Antonietti,<sup>‡</sup> Qing Qin,<sup>‡</sup> Martin Oschatz,<sup>‡</sup> and Thomas D. Kühne<sup>\*,†,¶</sup>

<sup>†</sup>*Dynamics of Condensed Matter and Center for Sustainable System Design, Chair of Theoretical Chemistry, University of Paderborn, Warburger Str. 100, D-33098 Paderborn, Germany*

<sup>‡</sup>*Department of Colloid Chemistry, Max Planck Institute of Colloids and Interfaces, Am Mühlenberg 1, D-14476 Potsdam, Germany*

<sup>¶</sup>*Paderborn Center for Parallel Computing and Institute for Lightweight Design, University of Paderborn, Warburger Str. 100, D-33098 Paderborn, Germany*

\*Email: [tdkuehne@mail.uni-paderborn.de](mailto:tdkuehne@mail.uni-paderborn.de)

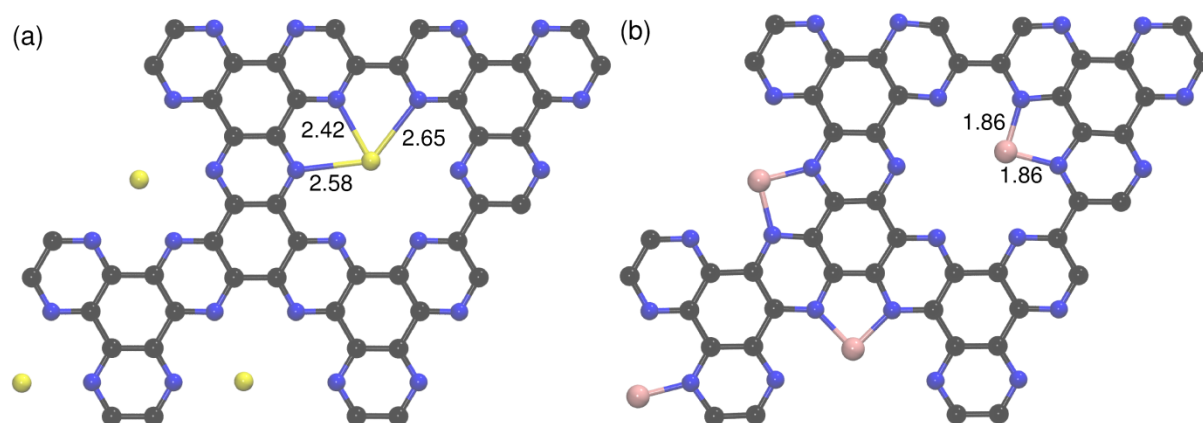

Figure S1: The structure of metal atoms supported in the C<sub>2</sub>N framework Au-C<sub>2</sub>N (a) and Fe-C<sub>2</sub>N (b). The distance (in units of Å) between the metal atom and the nearest nitrogen atoms of the C<sub>2</sub>N framework are highlighted. Atoms color: C-black, N-blue, Au-yellow and Fe-pink.

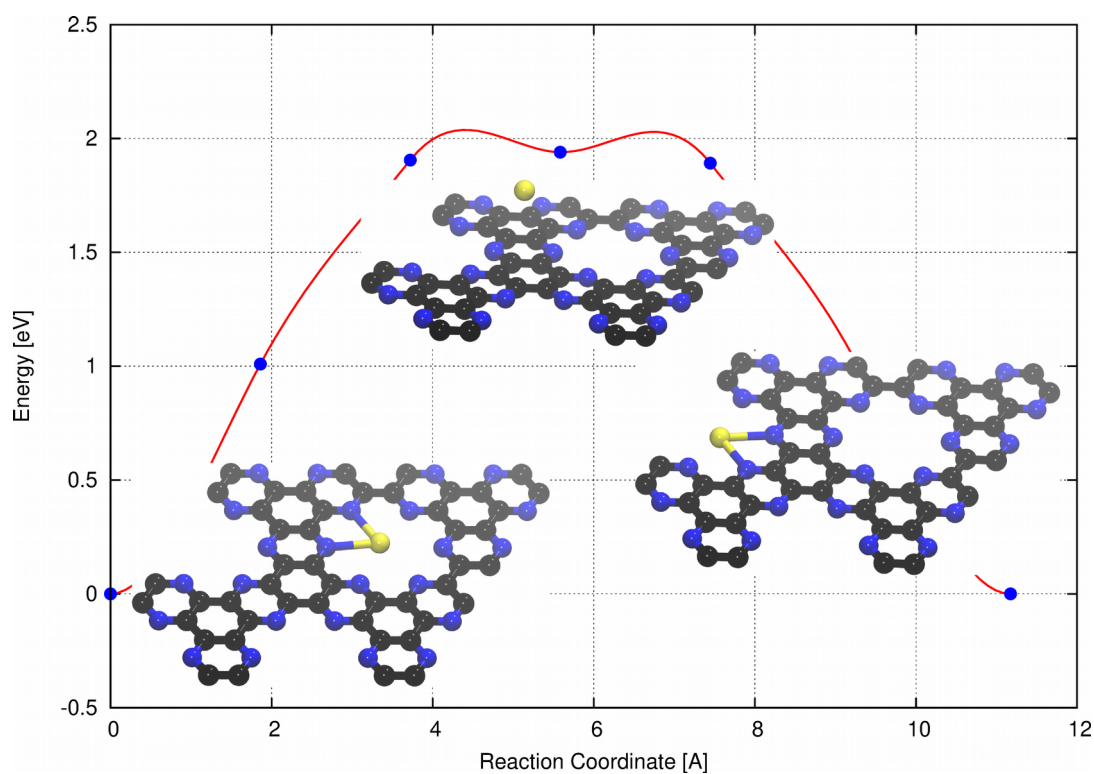

Figure S2: The potential energy surface obtained from the nudged elastic band calculation for the diffusion of a single Au atom from one site to the other on the C<sub>2</sub>N surface.

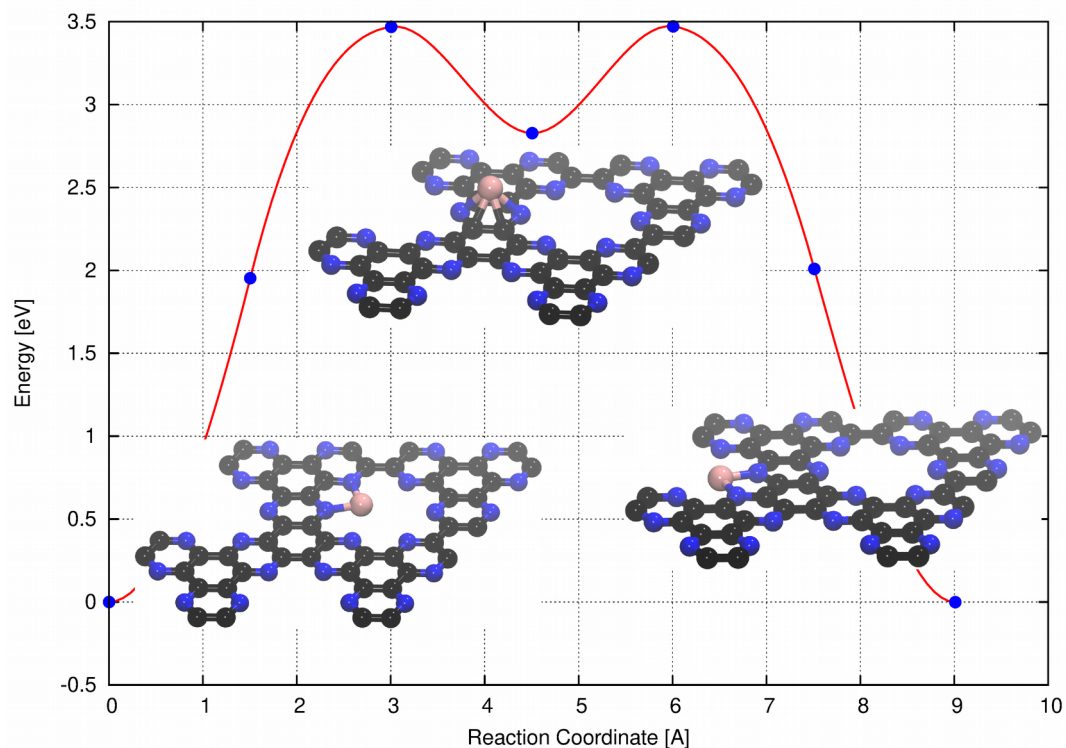

Figure S3: The potential energy surface obtained from the nudged elastic band calculation for the diffusion of a single Fe atom from one site to the other on the C<sub>2</sub>N surface.

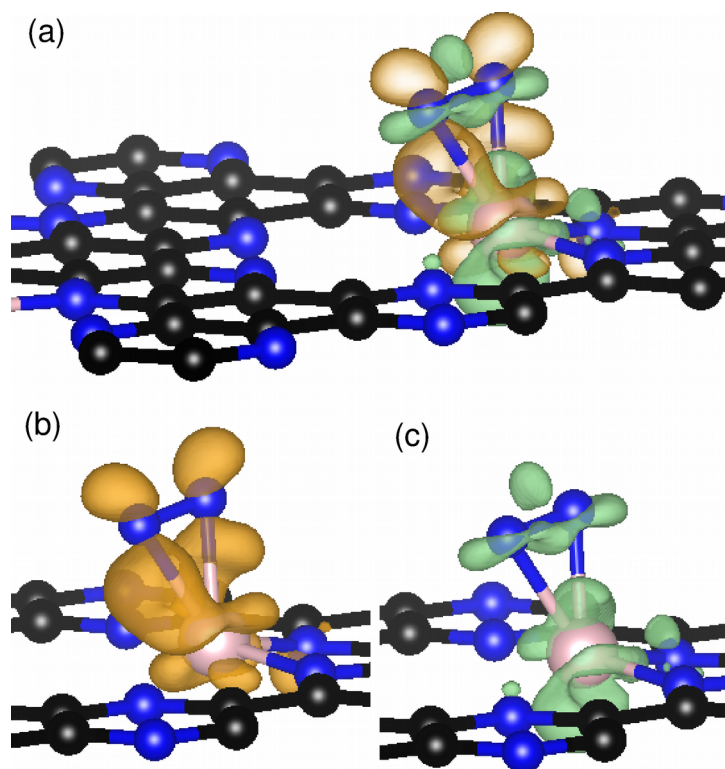

Figure S4: (a) The electron density difference (isovalue =  $\pm 0.004 \text{ e}/\text{\AA}^3$ ) plot for the N<sub>2</sub> adsorption over Fe-C<sub>2</sub>N in side-wise fashion. The orange and the turquoise colors represent electron density accumulation and depletion, respectively. The accumulation and depletion of electron density are shown separately in (b) and (c), respectively.

### Electrochemical N<sub>2</sub> reduction to NH<sub>3</sub>

Table S1: The zero point energy (ZPE) and vibrational entropy contribution (at 300 K) of various intermediates that could be formed during the reaction using Au-C<sub>2</sub>N as a catalyst.

| Structure                                              | ZPE (eV) | TS (eV) |
|--------------------------------------------------------|----------|---------|
| NH <sub>3</sub>                                        | 0.585    | 0.60006 |
| H <sub>2</sub>                                         | 0.265    | 0.40686 |
| N <sub>2</sub>                                         | 0.149    | 0.59631 |
| Au-C <sub>2</sub> N                                    | 10.904   | 4.027   |
| N <sub>2</sub> @ Au-C <sub>2</sub> N                   | 11.074   | 4.641   |
| HN-N@ Au-C <sub>2</sub> N                              | 11.391   | 4.708   |
| H <sub>2</sub> N-N@ Au-C <sub>2</sub> N                | 11.756   | 4.490   |
| N@ Au-C <sub>2</sub> N                                 | 11.091   | 4.251   |
| HN@ Au-C <sub>2</sub> N                                | 11.313   | 4.485   |
| H <sub>2</sub> N@ Au-C <sub>2</sub> N                  | 11.572   | 4.505   |
| H <sub>3</sub> N@ Au-C <sub>2</sub> N                  | 11.986   | 4.395   |
| HN-NH@ Au-C <sub>2</sub> N                             | 11.771   | 4.230   |
| H <sub>2</sub> N-NH@ Au-C <sub>2</sub> N               | 12.069   | 4.673   |
| H <sub>2</sub> N-NH <sub>2</sub> @ Au-C <sub>2</sub> N | 12.444   | 4.575   |

Table S2: The zero point energy (ZPE) and vibrational entropy contribution (at 300 K) of various intermediates that could be formed during the reaction using Fe-C<sub>2</sub>N as a catalyst.

| Structure                                                 | ZPE (eV) | TS (eV) |
|-----------------------------------------------------------|----------|---------|
| Fe-C <sub>2</sub> N                                       | 11.111   | 3.2     |
| N <sub>2</sub> @ Fe-C <sub>2</sub> N                      | 11.316   | 3.393   |
| HN-N@ Fe-C <sub>2</sub> N                                 | 11.559   | 3.624   |
| H <sub>2</sub> N-N@ Fe-C <sub>2</sub> N                   | 11.905   | 3.527   |
| N@ Fe-C <sub>2</sub> N                                    | 11.192   | 3.349   |
| HN@ Fe-C <sub>2</sub> N                                   | 11.464   | 3.355   |
| H <sub>2</sub> N@ Fe-C <sub>2</sub> N                     | 11.765   | 3.414   |
| H <sub>3</sub> N@ Fe-C <sub>2</sub> N                     | 12.133   | 3.301   |
| HN-NH@ Fe-C <sub>2</sub> N                                | 11.910   | 3.489   |
| H <sub>2</sub> N-NH@ Fe-C <sub>2</sub> N                  | 12.225   | 3.482   |
| H <sub>2</sub> N-NH <sub>2</sub> @ Fe-C <sub>2</sub> N    | 12.590   | 3.570   |
| Enzymatic pathway                                         |          |         |
| N <sub>2</sub> @ Fe-C <sub>2</sub> N                      | 11.303   | 3.502   |
| HN-N@ Fe-C <sub>2</sub> N                                 | 11.580   | 3.485   |
| HN-NH@ Fe-C <sub>2</sub> N                                | 11.914   | 3.445   |
| H <sub>2</sub> N-NH@ Fe-C <sub>2</sub> N                  | 12.231   | 3.424   |
| (H <sub>2</sub> N) <sub>2</sub> @ Fe-C <sub>2</sub> N     | 12.485   | 3.511   |
| (H <sub>2</sub> N)(H <sub>3</sub> N)@ Fe-C <sub>2</sub> N | 12.839   | 3.537   |

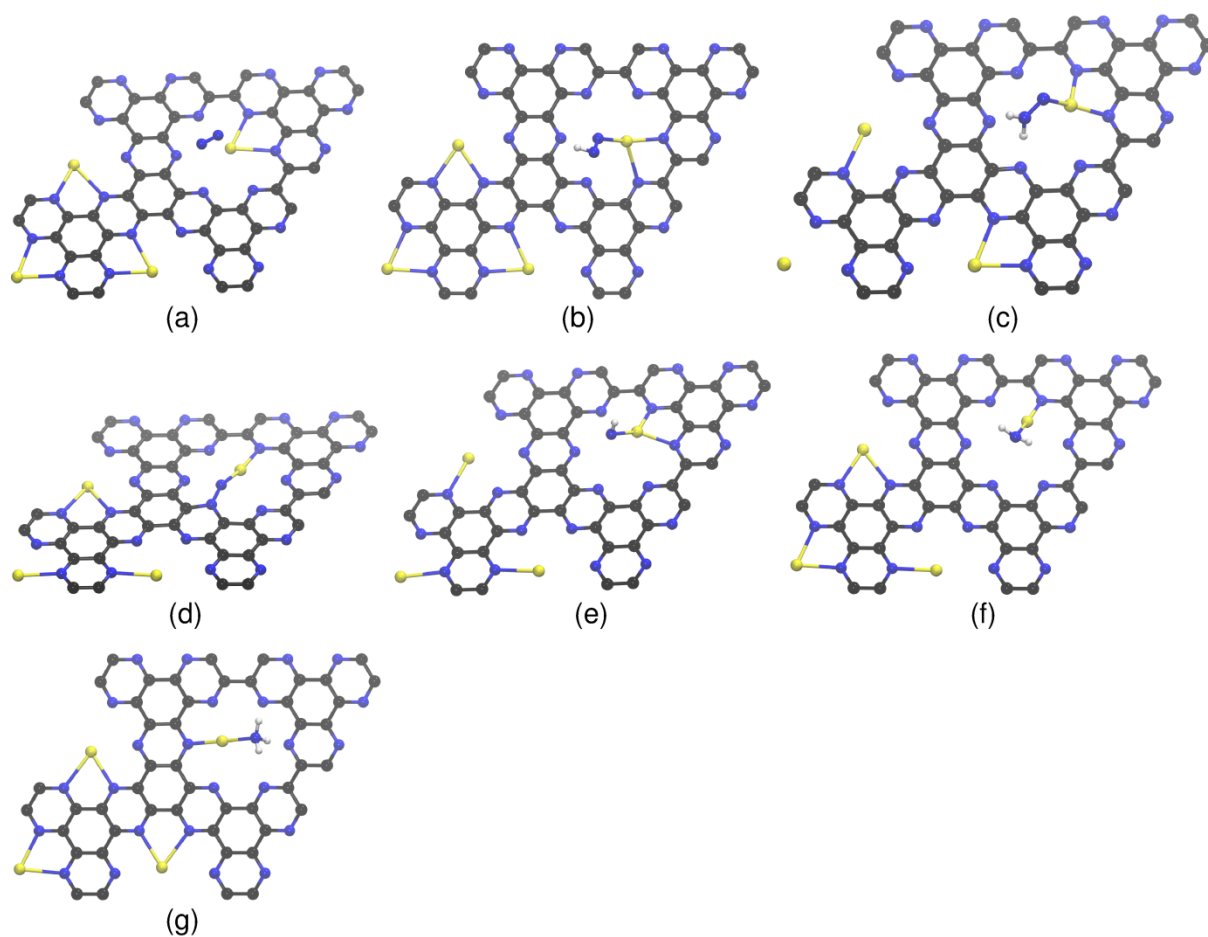

Figure S5: The atomic structure of various intermediates: (a)  $N_2@Au-C_2N$ , (b)  $HN-N@Au-C_2N$ , (c)  $H_2N-N@Au-C_2N$ , (d)  $N@Au-C_2N$ , (e)  $HN@Au-C_2N$ , (f)  $H_2N@Au-C_2N$  and (g)  $H_3N@Au-C_2N$  of the NRR through the distal pathway. Atoms color: C-black, N-blue, H-white and Au-yellow.

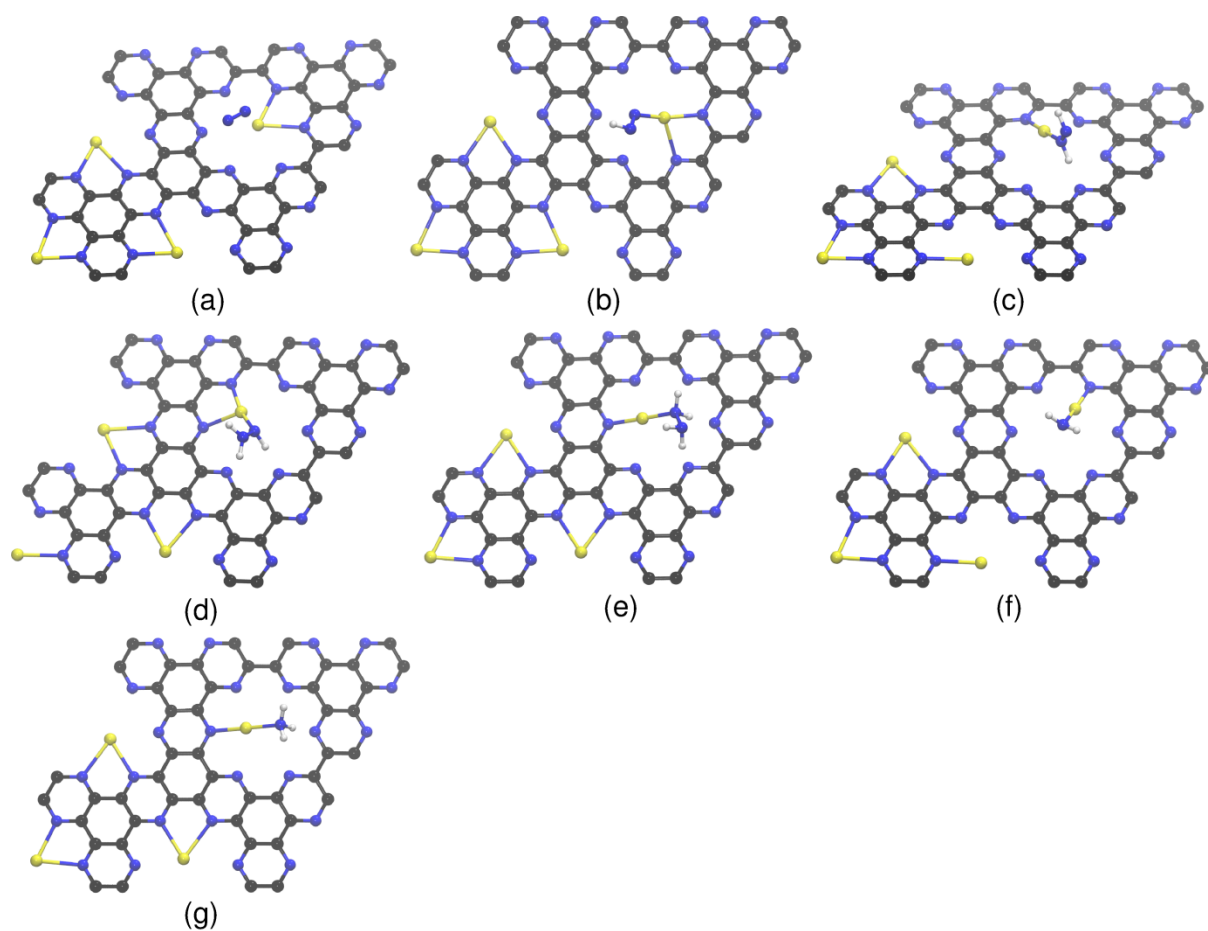

Figure S6: The atomic structure of the various intermediates: (a)  $\text{N}_2@\text{Au-C}_2\text{N}$ , (b)  $\text{HN-N@Au-C}_2\text{N}$ , (c)  $\text{HN-NH@Au-C}_2\text{N}$ , (d)  $\text{H}_2\text{N-NH@Au-C}_2\text{N}$ , (e)  $\text{H}_2\text{N-NH}_2@\text{Au-C}_2\text{N}$ , (f)  $\text{H}_2\text{N@Au-C}_2\text{N}$  and (g)  $\text{H}_3\text{N@Au-C}_2\text{N}$  of the NRR through the alternating pathway. Atoms color: C-black, N-blue, H-white and Au-yellow.

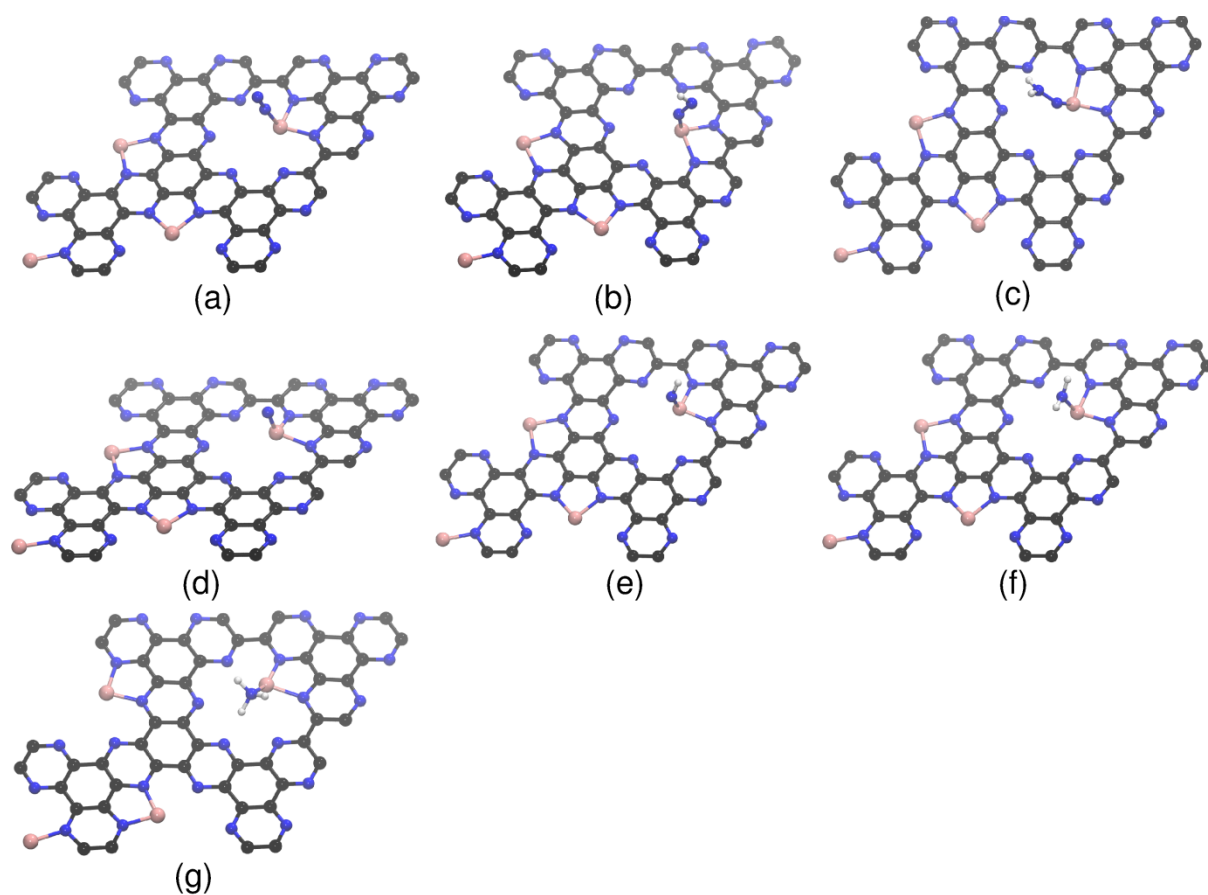

Figure S7: The atomic structure of various intermediates: (a)  $\text{N}_2@\text{Fe-C}_2\text{N}$ , (b)  $\text{HN-N}@\text{Fe-C}_2\text{N}$ , (c)  $\text{H}_2\text{N-N}@\text{Fe-C}_2\text{N}$ , (d)  $\text{N}@\text{Fe-C}_2\text{N}$ , (e)  $\text{HN}@\text{Fe-C}_2\text{N}$ , (f)  $\text{H}_2\text{N}@\text{Fe-C}_2\text{N}$  and (g)  $\text{H}_3\text{N}@\text{Fe-C}_2\text{N}$  of the electrochemical NRR through the distal pathway. Atoms color: C-black, N-blue, H-white and Fe-pink.

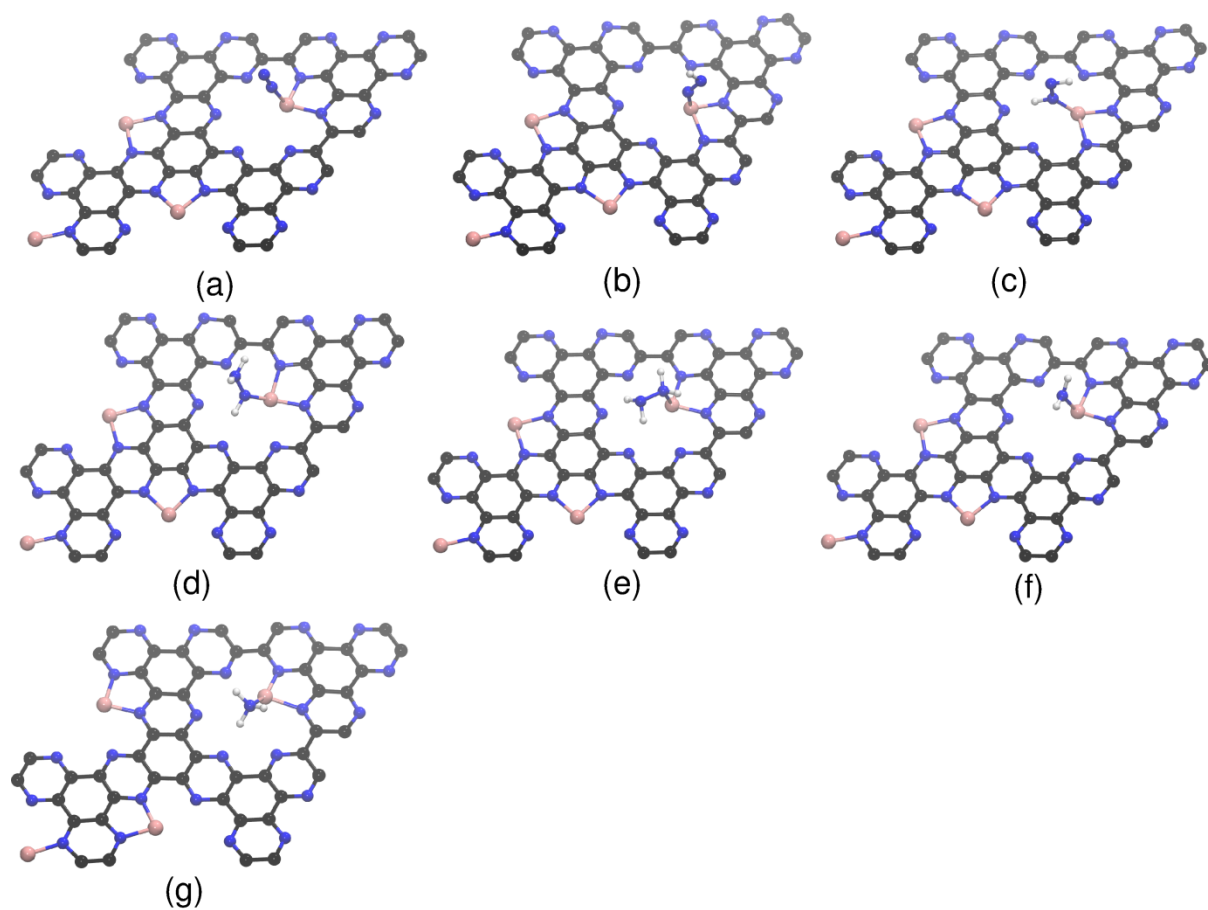

Figure S8: The atomic structure of the various intermediates: (a)  $\text{N}_2@\text{Fe-C}_2\text{N}$ , (b)  $\text{HN-N}@\text{Fe-C}_2\text{N}$ , (c)  $\text{HN-NH}@\text{Fe-C}_2\text{N}$ , (d)  $\text{H}_2\text{N-NH}@\text{Fe-C}_2\text{N}$ , (e)  $\text{H}_2\text{N-NH}_2@\text{Fe-C}_2\text{N}$ , (f)  $\text{H}_2\text{N}@\text{Fe-C}_2\text{N}$  and (g)  $\text{H}_3\text{N}@\text{Fe-C}_2\text{N}$  of the NRR through the alternating pathway. Atoms color: C-black, N-blue, H-white and Fe-pink.



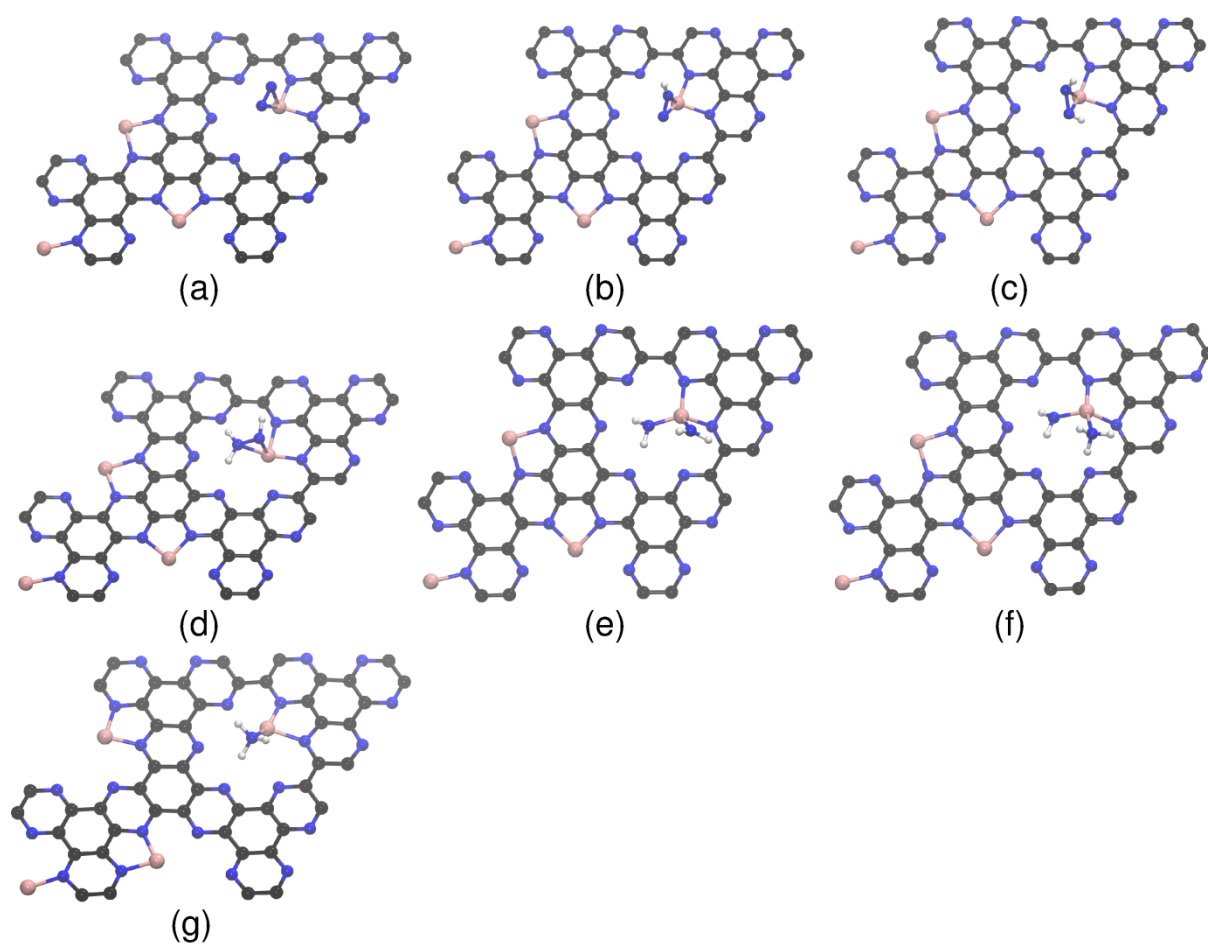

Figure S9: Structure of the various intermediates: (a)  $\text{N}_2@\text{Fe-C}_2\text{N}$ , (b)  $\text{HN-N}@\text{Fe-C}_2\text{N}$ , (c)  $\text{HN-NH}@\text{Fe-C}_2\text{N}$ , (d)  $\text{H}_2\text{N-NH}@\text{Fe-C}_2\text{N}$ , (e)  $(\text{H}_2\text{N})_2@\text{Fe-C}_2\text{N}$ , (f)  $(\text{H}_2\text{N})(\text{H}_3\text{N})@\text{Fe-C}_2\text{N}$  and (g)  $\text{H}_3\text{N}@\text{Fe-C}_2\text{N}$  of the NRR through the enzymatic pathway. Atoms colour: C-black, N-blue, H-white and Fe-pink.

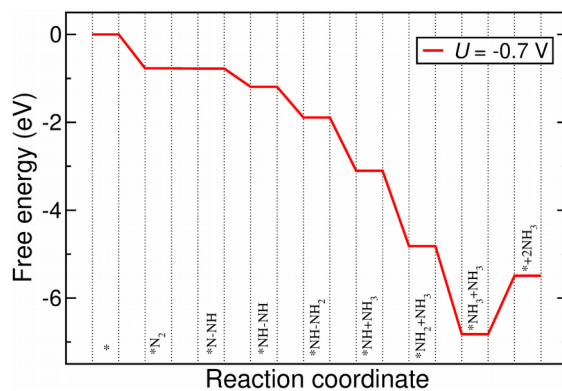

Figure S10: The minimum free energy pathway for the electrochemical NRR using  $\text{Fe-C}_2\text{N}$  as catalyst.

## Hydrogen evolution reaction

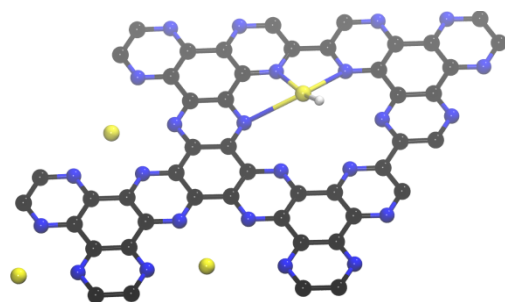

Figure S11: The structure of H@Au-C<sub>2</sub>N, where the H atom is bonded to the Au atom.

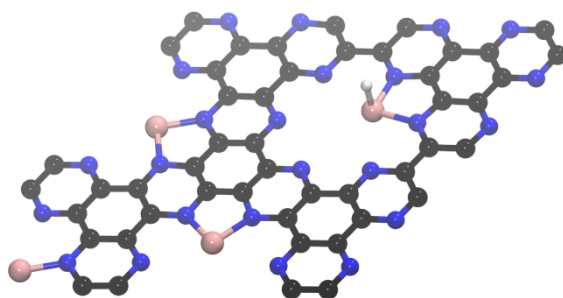

Figure S12: The structure of H@Fe-C<sub>2</sub>N, where the H atom is bonded to the Fe atom.

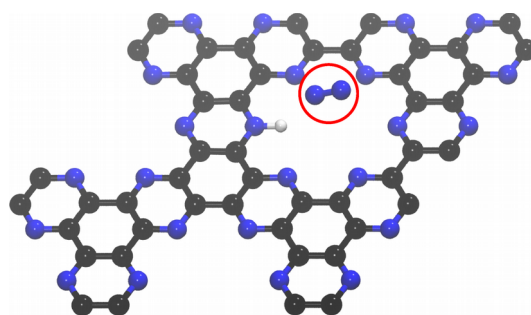

Figure S13: The final structure obtained from the geometry optimization of \*NNH intermediate in bare C<sub>2</sub>N. The N<sub>2</sub> molecule, which is separated from \*NNH intermediate during the optimization, is highlighted in the red color circle.

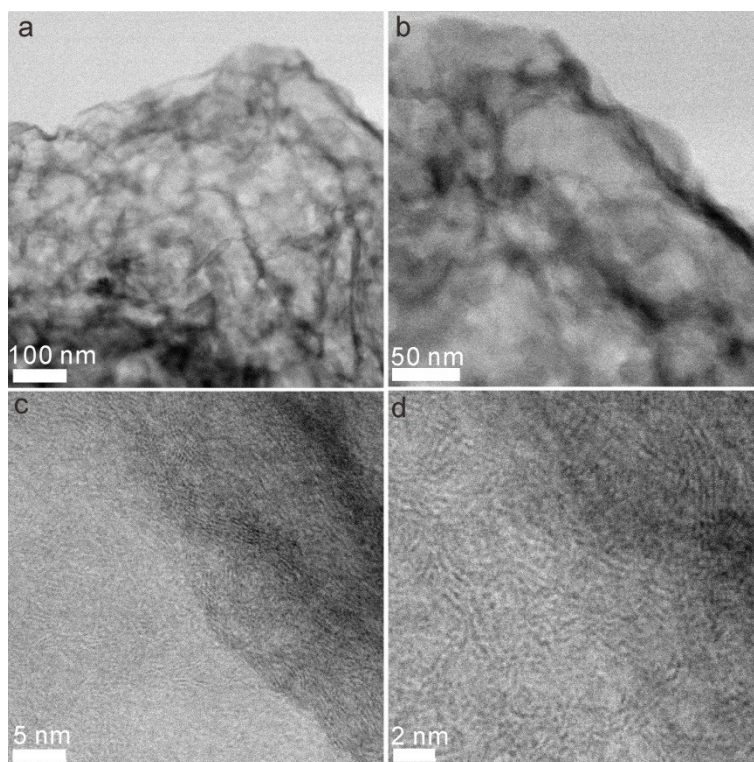

Figure S14: Representative TEM and HRTEM images of NDPC.

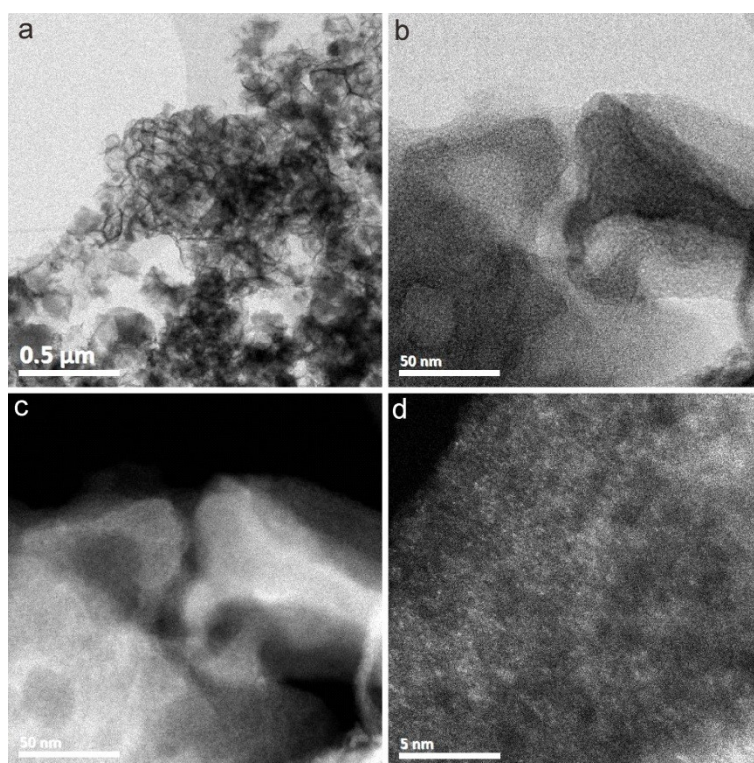

Figure S15: (a) Representative TEM image of FeSAs-NDPC. (b) Aberration-corrected STEM image in bright field mode. (c) Aberration-corrected STEM image in dark field mode. (d) High magnification HAADF-STEM image.

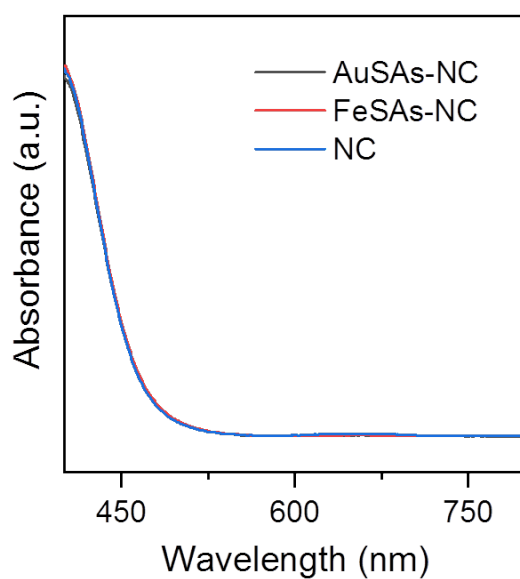

Figure S16: UV-Vis absorption spectra of the Ar-saturated electrolyte after the electrolysis at -0.2 V vs. RHE using AuSAs-NDPC, FeSAs-NDPC and NDPC as catalyst.

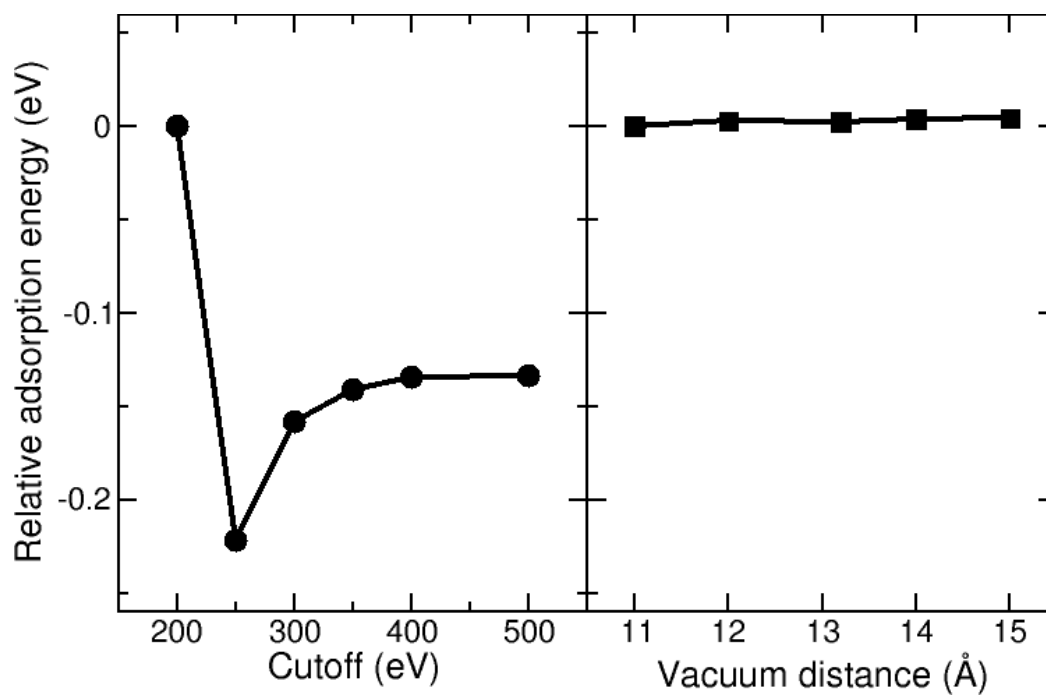

Figure S17: The relative adsorption energy of NH<sub>3</sub> molecule over Fe-C<sub>2</sub>N catalyst with respect to the plane-wave cut-off energy and the vacuum distance.
